# Supplementary material
Source: PubMed Central journal article supplement (PMC9999291)
Supplement: NIHMS1877689-supplement-Supplemental_Material.pdf [file NIHMS1877689-supplement-Supplemental_Material.pdf]

## Supplemental information

### Microglia states and nomenclature:

#### A field at its crossroads

Rosa C. Paolicelli, Amanda Sierra, Beth Stevens, Marie-Eve Tremblay, Adriano Aguzzi, Bahareh Ajami, Ido Amit, Etienne Audinat, Ingo Bechmann, Mariko Bennett, Frederick Bennett, Alain Bessis, Knut Biber, Staci Bilbo, Mathew Blurton-Jones, Erik Boddeke, Dora Brites, Bert Brône, Guy C. Brown, Oleg Butovsky, Monica J. Carson, Bernardo Castellano, Marco Colonna, Sally A. Cowley, Colm Cunningham, Dimitrios Davalos, Philip L. De Jager, Bart de Strooper, Adam Denes, Bart J.L. Eggen, Ukpong Eyo, Elena Galea, Sonia Garel, Florent Ginhoux, Christopher K. Glass, Ozgun Gokce, Diego Gomez-Nicola, Berta González, Siamon Gordon, Manuel B. Graeber, Andrew D. Greenhalgh, Pierre Gressens, Melanie Greter, David H. Gutmann, Christian Haass, Michael T. Heneka, Frank L. Heppner, Soyon Hong, David A. Hume, Steffen Jung, Helmut Kettenmann, Jonathan Kipnis, Ryuta Koyama, Greg Lemke, Marina Lynch, Ania Majewska, Marzia Malcangio, Tarja Malm, Renzo Mancuso, Takahiro Masuda, Michela Matteoli, Barry W. McColl, Veronique E. Miron, Anna Victoria Molofsky, Michelle Monje, Eva Mracsko, Agnes Nadjar, Jonas J. Neher, Urte Neniskyte, Harald Neumann, Mami Noda, Bo Peng, Francesca Peri, V. Hugh Perry, Phillip G. Popovich, Clare Pridans, Josef Priller, Marco Prinz, Davide Ragozzino, Richard M. Ransohoff, Michael W. Salter, Anne Schaefer, Dorothy P. Schafer, Michal Schwartz, Mikael Simons, Cody J. Smith, Wolfgang J. Streit, Tuan Leng Tay, Li-Huei Tsai, Alexei Verkhratsky, Rommy von Bernhardi, Hiroaki Wake, Valérie Wittamer, Susanne A. Wolf, Long-Jun Wu, and Tony Wyss-Coray

## Questions

1. How do you define yourself? (if more than one, assign order)
  - a. Neuroscientist/Neurobiologist
  - b. Immunologist
  - c. Neuroimmunologist
  - d. Other
2. Do you think that microglia can be subdivided in closed/fixed categories based on their morphology, marker expression or transcriptional profile? Or do you think those categories are meaningless?
3. Do you think microglial responses are all-or-nothing or is there a continuum?
4. What is your opinion on the different microglial nomenclature historically proposed:
  - a. Resting vs Activated
  - b. M1 vs M2
  - c. Homeostatic vs DAM
  - d. Do you think that these different nomenclatures are related?
  - e. How often do you use them?
  - f. Do you think the community should replace these with a consensus nomenclature?
  - g. Do you think that having a consensus nomenclature is useful for the field?
5. What is your definition of “marker”? Which ones are relevant to study microglia? For which purposes you use them?
6. Is phenotyping (even with sophisticated methods such as scRNAseq) sufficient to assess microglial function?
7. What is your definition of neuroinflammation?
8. Do you agree with the assumption that neuroinflammation is always detrimental?
9. How similar do you think microglia are to other resident macrophages?
10. Are there any other points you would like to bring up?
